# Supplementary material for: Valorization of Tomato Residues by Supercritical Fluid Extraction
Source: MDPI journal article supplement (doi:10.3390/pr10010028), 2021-12-24
Supplement: s1 [file s1]

## Supplementary Material

# Valorization of tomato residues by supercritical fluid extraction

José P. S. Aniceto\*, Vítor H. Rodrigues, Inês Portugal and Carlos M. Silva\*

CICECO – Aveiro Institute of Materials, Department of Chemistry, University of Aveiro, 3810-193 Aveiro, Portugal

\* corresponding authors: carlos.manuel@ua.pt; joseaniceto@ua.pt

## Introduction

In this article we present some unpublished work on the supercritical fluid extraction of tomato residues. Below we provide details on these experimental runs.

## Materials and methods

Carbon dioxide (CO<sub>2</sub>, purity 99%) was supplied by Air Liquide (Algés, Portugal). Dichloromethane (purity 99.98%) and ethanol (purity 99.5%) were supplied by Fisher Scientific (Leicestershire, UK). Ethyl acetate (purity 99%) was supplied by VWR International (Fontenay-sous-Bois, France).

Tomato residues containing skins, seeds and tissues were provided by a local tomato processing facility in Portugal. The samples, which had an initial moisture content of 70.6 wt.%, were dried at 60 °C for 72 h in a forced convection oven. No further pretreatment was applied.

The supercritical fluid extraction runs were performed in a lab scale Spe-ed SFE unit, a model of Helix SFE System-Applied Separations, Inc. (Allentown, PA, USA) which is described in greater detail in previous works [1]. In each run, about 20 g of tomato residues were loaded into the extractor. The supercritical carbon dioxide at 300 bar and 60 °C flowed upwards through the extraction vessel at a constant flow rate of 12 g min<sup>-1</sup> for 6 h. Extractions were performed using pure CO<sub>2</sub>, CO<sub>2</sub> with 10 % ethanol and CO<sub>2</sub> with 10 % of ethyl acetate. The ethanol and ethyl acetate cosolvents were fed to the pre-heating vessel using a HPLC pump to modify the supercritical fluid polarity and the solubility of solutes.

The total extraction yield was determined according to the following equation:

$$\eta_{\text{total}} = \frac{m_{\text{extract}}}{m_{\text{bio}}} \times 100$$

where  $\eta_{\text{total}}$  is the total yield,  $m_{\text{extract}}$  is the amount of extract, and  $m_{\text{bio}}$  is the amount of dry biomass loaded into the extractor.

## Results

Table S1 lists the SFE runs conducted and the total yield obtained after 6 h. The highest yield was obtained using ethanol as cosolvent and the lowest using pure CO<sub>2</sub>.

Table S1 – SFE experimental conditions and total yields obtained. Fixed conditions: 300 bar/60 °C/12 g min<sup>-1</sup>/6 h.

| Run | Cosolvent             | Mass (g) | Total yield (%) |
|-----|-----------------------|----------|-----------------|
| 1   | None                  | 19.943   | 3.06            |
| 2   | 10 % ethanol          | 20.778   | 3.82            |
| 3   | 10 % of ethyl acetate | 20.112   | 3.52            |

Figure S1 shows the extraction curves for the three experimental runs conducted. Fractions were collected at 30 min, 1 h, 2 h, 3 h, 4 h, and 6 h. It is visible that ethyl acetate, despite providing a lower total yield than ethanol, produces a faster extraction rate in the first 2 h.

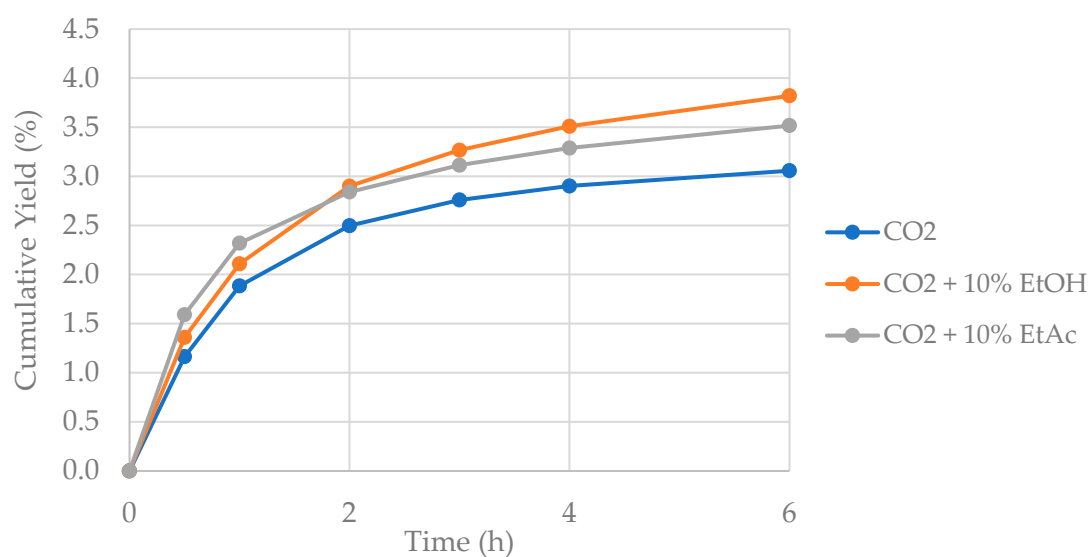

Figure S1 – Extraction curves of tomato residues using pure CO<sub>2</sub>, CO<sub>2</sub> with 10 % ethanol (EtOH), and CO<sub>2</sub> with 10 % ethyl acetate (EtAc).

## References

1. Rodrigues, V.H.; de Melo, M.M.R.; Portugal, I.; Silva, C.M. Extraction of Eucalyptus leaves using solvents of distinct polarity. Cluster analysis and extracts characterization. *J. Supercrit. Fluids* **2018**, *135*, 263–274, doi:10.1016/J.SUPFLU.2018.01.010.
